# Supplementary material for: Homozygous Transgenic Barley (Hordeum vulgare L.) Plants by Anther Culture
Source: MDPI journal article supplement (doi:10.3390/plants9070918), 2020-07-20
Supplement: s1 [file s1]

Supplemental File

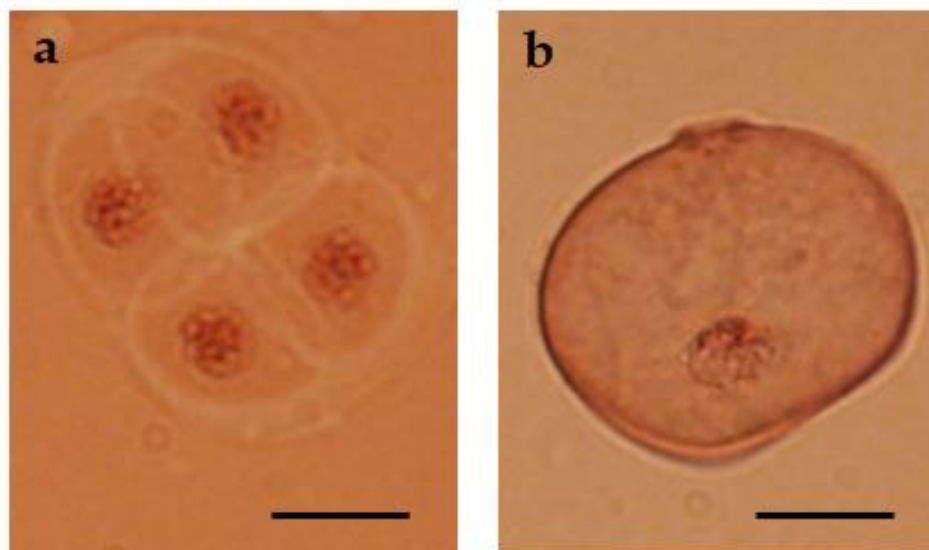

**Figure S1.** Barley microspores stained by acetocarmine, (a): microspore tetrad, (b): late-uninucleate microspore, Bar 10  $\mu$ m.

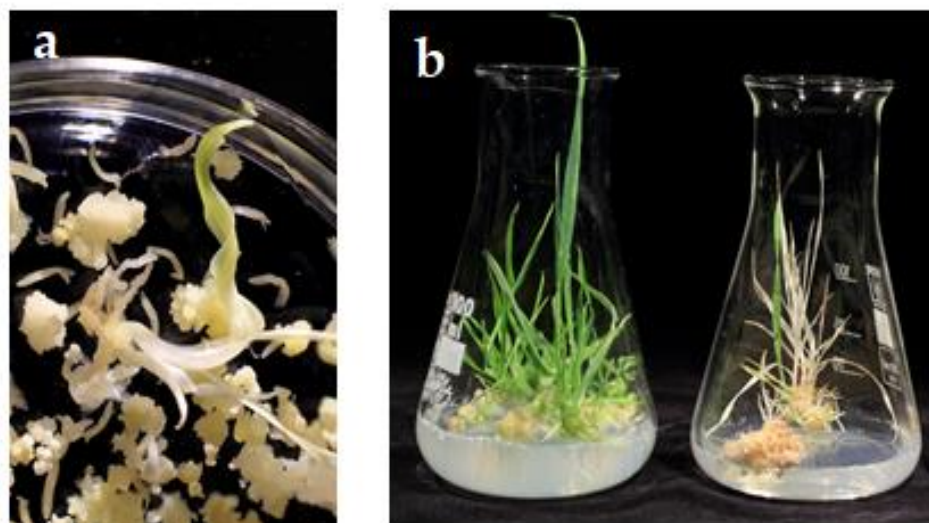

**Figure S2.** Induction and regeneration processes in barley anther culture, (a): pollen embryos or calli on induction medium after 4-5 weeks, (b): regenerating green and albinotic plantlets after 3 weeks on regeneration medium.

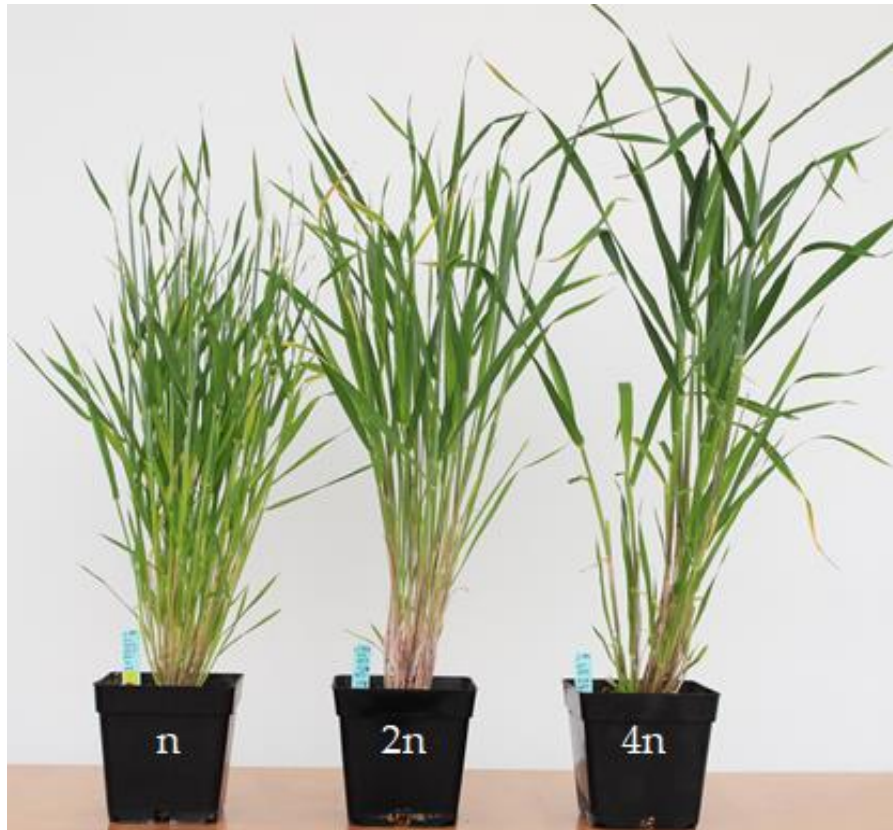

**Figure S3.** Regenerated plants from anthers of transgenic barley T1 generation, transgene Lim. The difference in appearance between a haploid plant (n), dihaploid plant (2n) and tetrahaploid plant (4n) are shown.

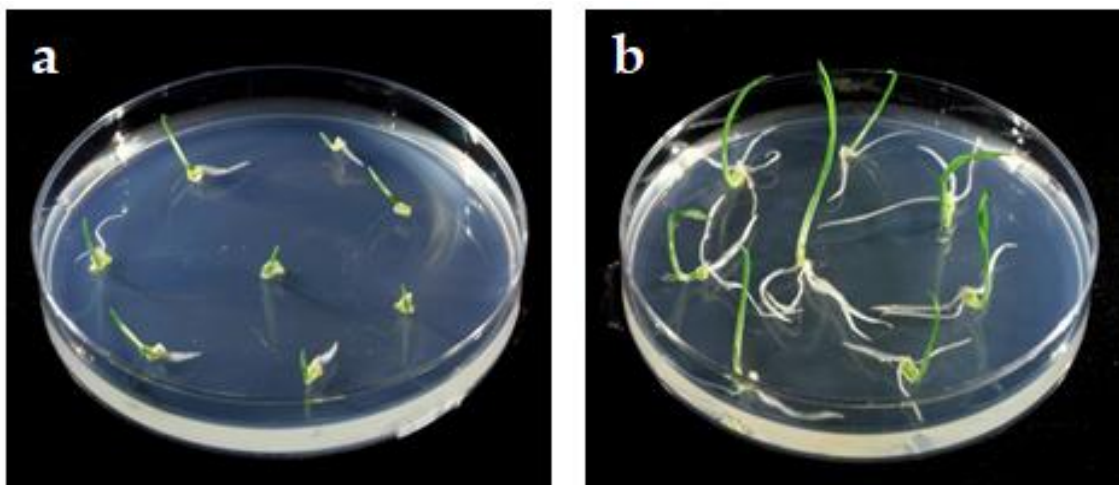

**Figure S4.** Transgenic barley embryo culture, (a): 5 days after cultivation, (b): 10 days after cultivation.

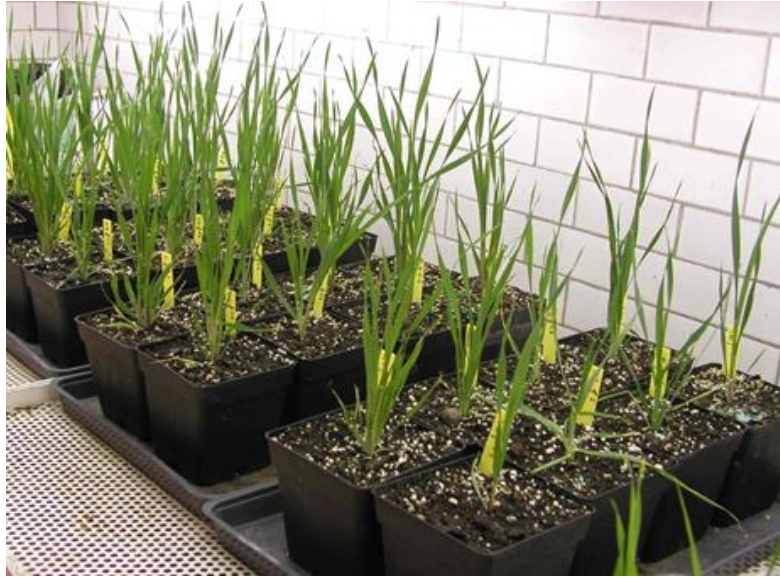

**Figure S5.** Transgenic plants (DH1 generation) regenerated from anther cultures.
